# Supplementary material for: Metabonomics and Transcriptomic Analysis of Free Fatty Acid Synthesis in Seedless and Tenera Oil Palm
Source: MDPI journal article supplement (doi:10.3390/ijms25031686), 2024-01-30
Supplement: s1 [file s1]

## Supplementary material

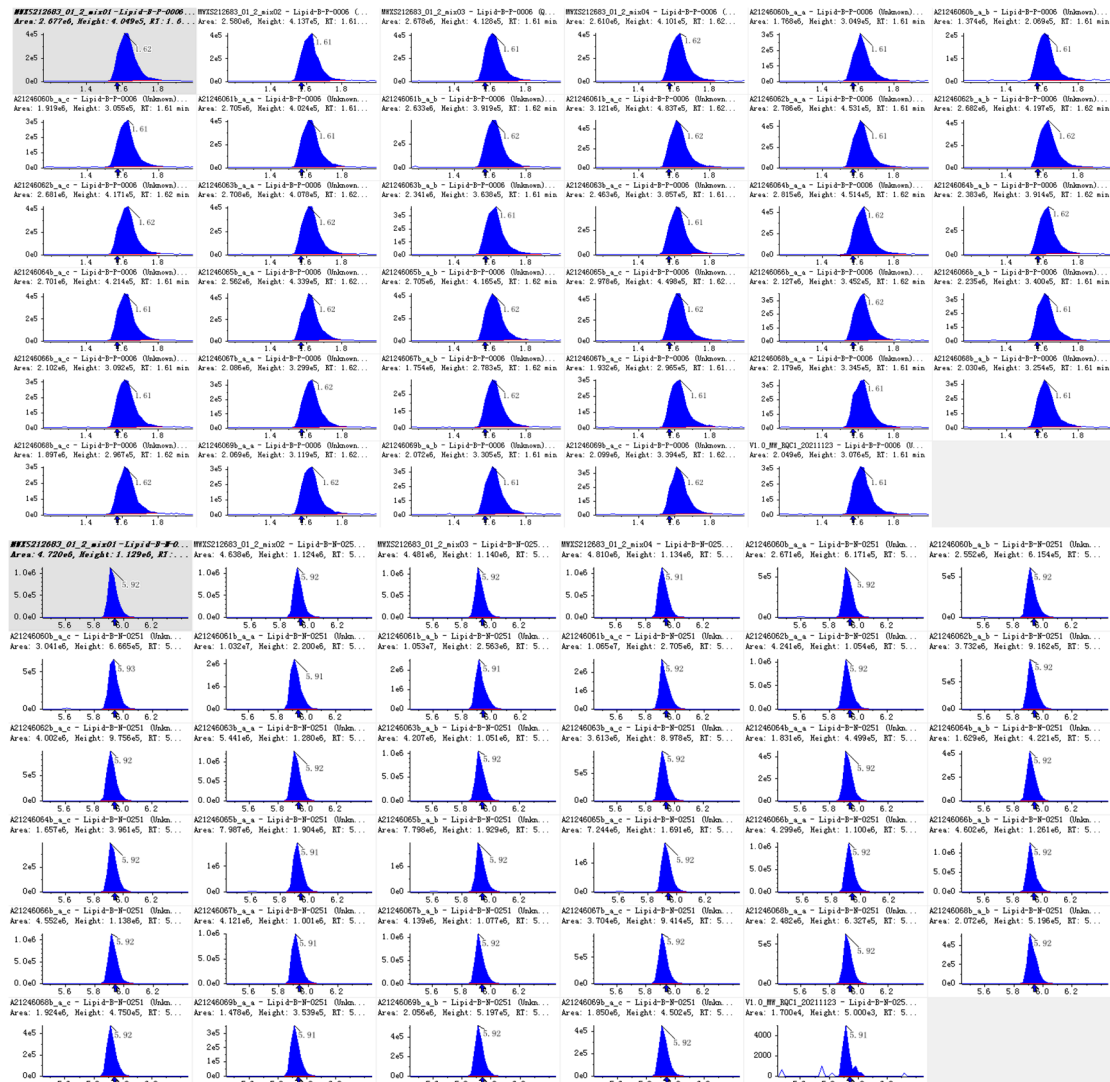

**Supplementary Figure S1:**Correction chart for mass spectrometry integration of fatty acid metabolites

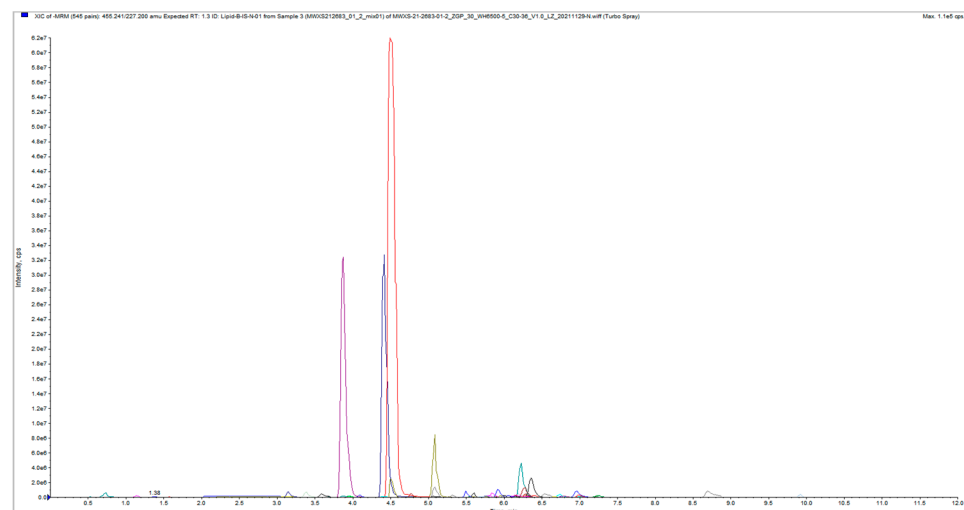

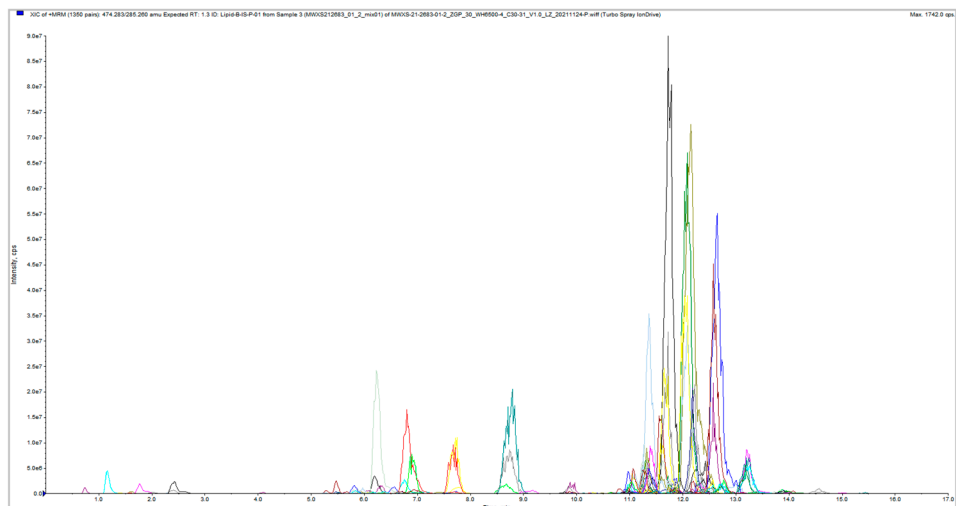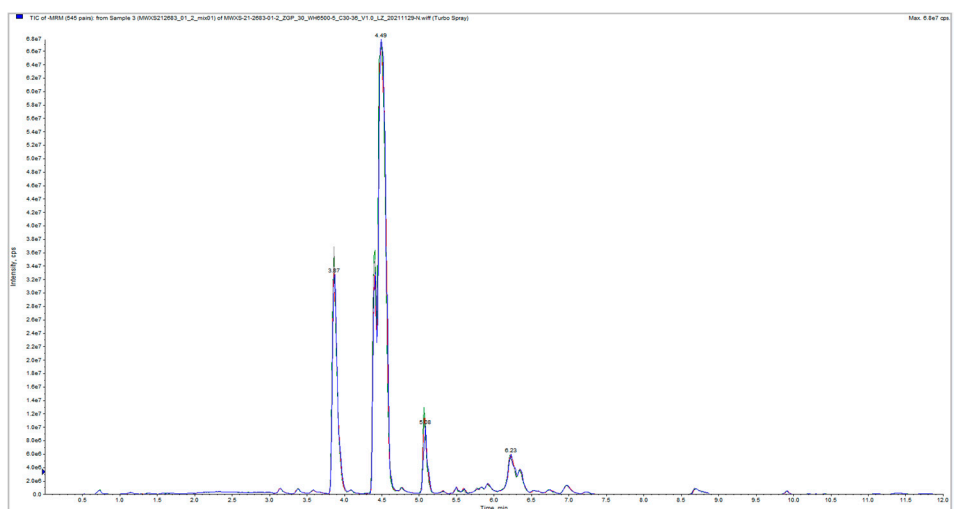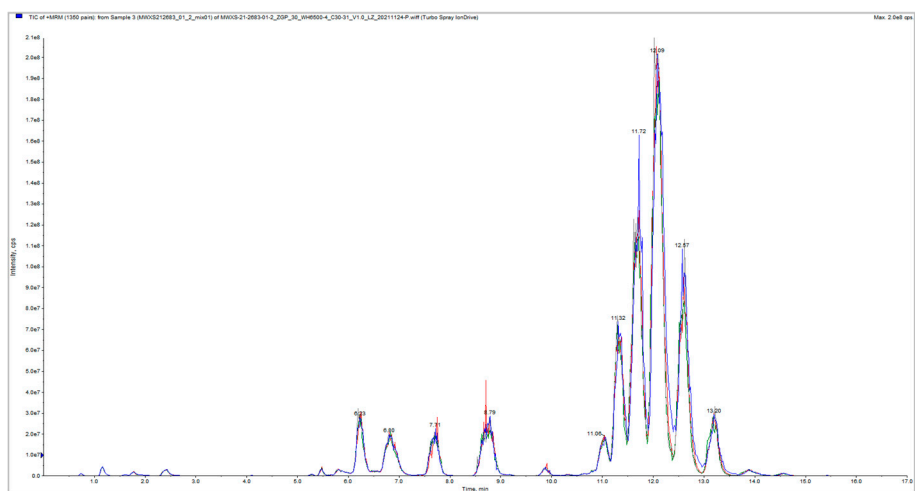

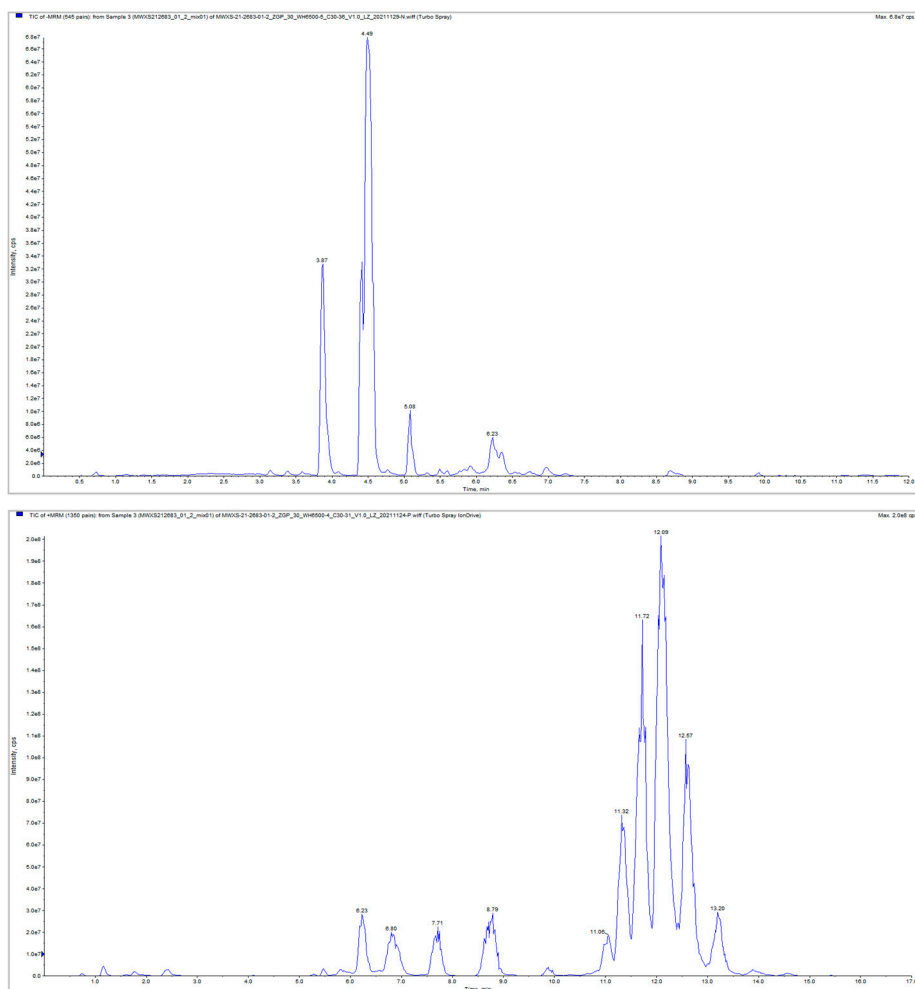

**Supplementary Figure S2: The MRM model**

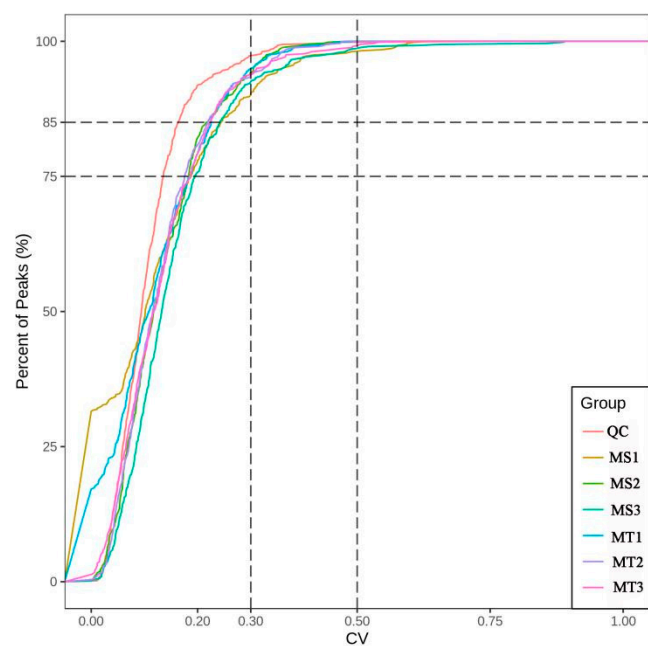

**Supplementary Figure S3: CV distribution map in samples MS1, MS2, MS3, MT1, MT2, and MT3**

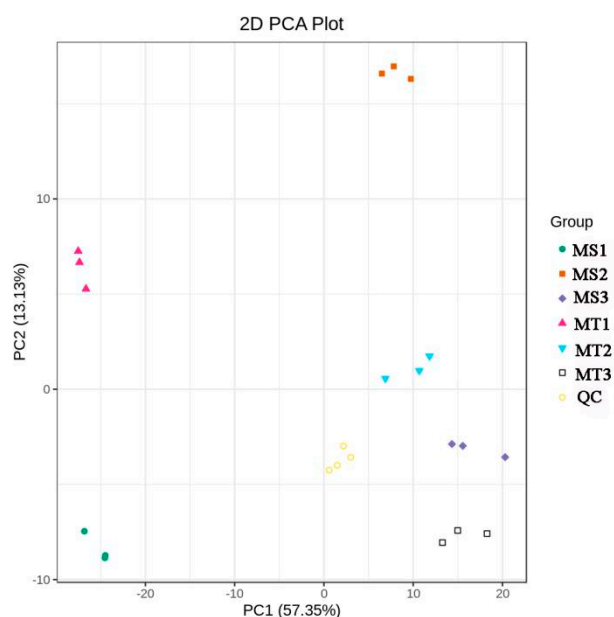

**Supplementary Figure S4:**Component analysis of MS and MT overall samples.QC is the quality control sample.

**Supplementary Table S1:** Mass of RNA-seq

| Sample | Raw Reads | Clean Reads | Clean Base(G) | Error Rate(%) | Q20(%) | Q30(%) | GC Content(%) |
|--------|-----------|-------------|---------------|---------------|--------|--------|---------------|
| MS1-1  | 48208652  | 45791886    | 6.87          | 0.03          | 97.46  | 92.88  | 49.12         |
| MS1-2  | 48099228  | 45286668    | 6.79          | 0.03          | 97.66  | 93.28  | 47.81         |
| MS1-3  | 47892422  | 44799750    | 6.72          | 0.03          | 97.67  | 93.34  | 49.07         |
| MS2-1  | 48211024  | 45808550    | 6.87          | 0.03          | 97.67  | 93.34  | 48.73         |
| MS2-2  | 46263496  | 44045448    | 6.61          | 0.03          | 97.50  | 92.91  | 47.86         |
| MS2-3  | 45421048  | 42279992    | 6.34          | 0.03          | 97.77  | 93.48  | 47.66         |
| MS3-1  | 48740904  | 46390726    | 6.96          | 0.03          | 97.76  | 93.52  | 48.97         |
| MS3-2  | 47079366  | 45077920    | 6.76          | 0.03          | 97.65  | 93.29  | 48.99         |
| MS3-3  | 57890096  | 56348144    | 8.45          | 0.03          | 97.39  | 92.85  | 48.47         |
| MT1-1  | 46359398  | 43300400    | 6.50          | 0.03          | 97.73  | 93.42  | 47.67         |
| MT1-2  | 45890134  | 42273062    | 6.34          | 0.03          | 97.67  | 93.33  | 47.82         |
| MT1-3  | 47574154  | 44909076    | 6.74          | 0.03          | 97.51  | 92.98  | 48.31         |
| MT2-1  | 48992046  | 45486604    | 6.82          | 0.03          | 97.72  | 93.46  | 48.81         |
| MT2-2  | 46921290  | 43943568    | 6.59          | 0.03          | 97.64  | 93.26  | 48.44         |
| MT2-3  | 47917708  | 44238738    | 6.64          | 0.03          | 97.58  | 93.10  | 48.65         |
| MT3-1  | 48145634  | 44847734    | 6.73          | 0.03          | 97.67  | 93.32  | 48.73         |
| MT3-2  | 46633640  | 43299316    | 6.49          | 0.03          | 97.18  | 92.16  | 48.83         |
| MT3-3  | 47406742  | 43203442    | 6.48          | 0.03          | 97.86  | 93.95  | 48.56         |

**Supplementary Table S2:**Design of primer for qRT-PCR

| Primer    | Sequence (5'-3')      |
|-----------|-----------------------|
| BC-qPCR-F | CCAGGTTTCAGGAGGTTGCTG |

|              |                       |
|--------------|-----------------------|
| BC-qPCR-R    | CTGGTGCTGCAGTTTGGCTA  |
| SAD-qPCR-F   | GGGAGGTCTCGGTGTAAGGA  |
| SAD-qPCR-R   | ACAAACACCAGCAGAGACCC  |
| FATA-qPCR-F  | CAGGAGAGCCGATTTGGACA  |
| FATA-qPCR-R  | TGCTTTCAAGGACCCATCCG  |
| FabI-qPCR-F  | GTTCTCAAATGCCCCGGCTTC |
| FabI-qPCR-R  | GGGCTTTTGGAATCCTGTTCA |
| ACC-qPCR-F   | GCTGATCCTGAGGTGAAGCA  |
| ACC-qPCR-R   | TTCCTTGGCCCTTGCAATCT  |
| FabB-qPCR-F  | CGACACCGTCCCCAATGTAA  |
| FabB-qPCR-R  | TTGTGACCCCCGAAACCAAA  |
| FabG4-qPCR-F | TACCATTGATGGCGGGATGG  |
| FabG4-qPCR-R | AAGCCGGAGCACATTACCAA  |
| FabZ-qPCR-F  | TCTTTGCCGCTTCTGTCTGT  |
| FabZ-qPCR-F  | AGCAAGGAAGACTCTGCCAA  |
| FatB-qPCR-R  | CAGCCAAGGGTTCCTGATCT  |
| FatB-qPCR-F  | TTCGACGCTTTTGCTGATGC  |
| FAD6-qPCR-R  | AGCGGGGTGGGATTTTAGTG  |
| FAD6-qPCR-F  | ACAGAGGAACCGCAGAGAGA  |
